# Supplementary material for: FTO-mediated cytoplasmic m6Am demethylation adjusts stem-like properties in colorectal cancer cell
Source: PubMed Central journal article supplement (PMC7979729; doi:10.1038/s41467-021-21758-4), 2021-03-19
Supplement: 41467_2021_21758_MOESM1_ESM.pdf [file 41467_2021_21758_MOESM1_ESM.pdf]

**a**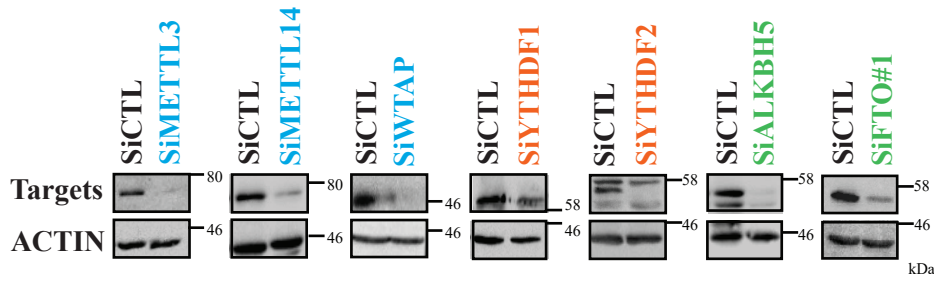**b**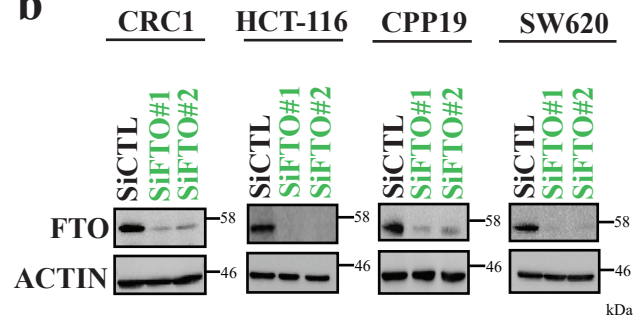**c**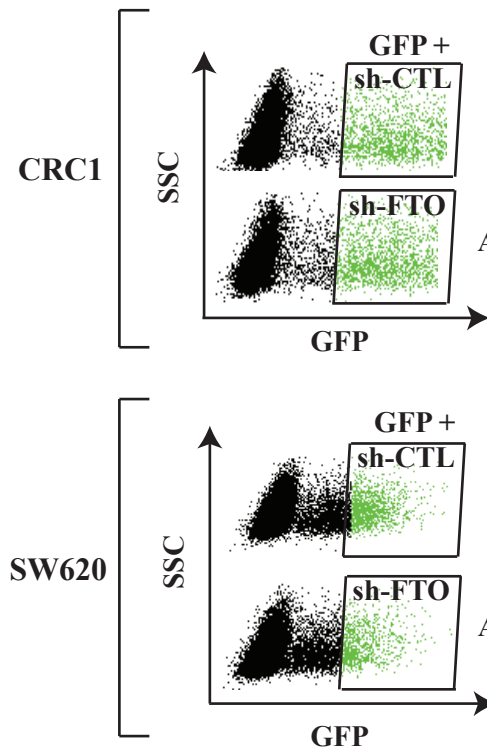**d**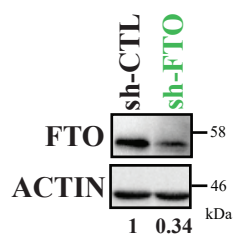**e**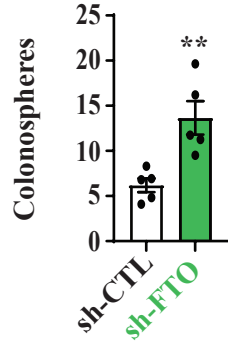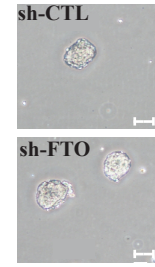**f**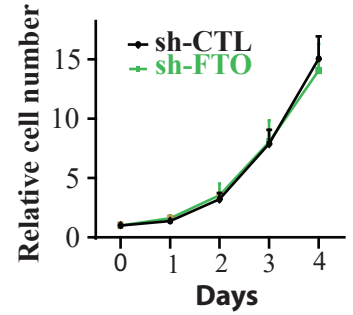**d**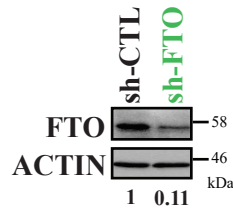**e**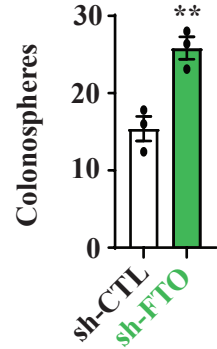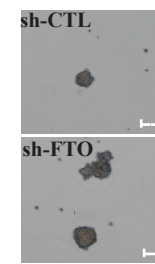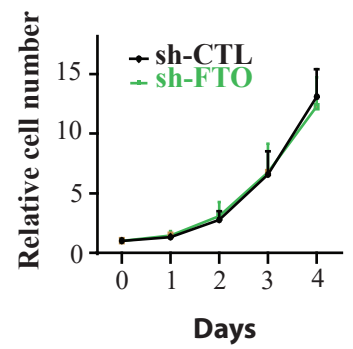**g**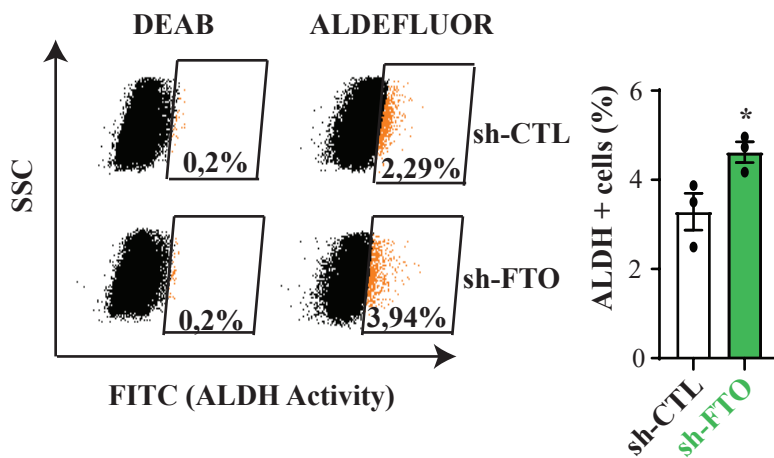**h**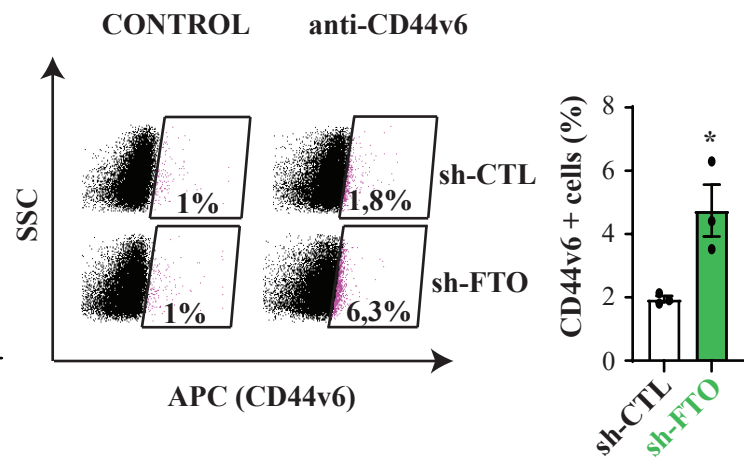

**Figure S1. (a-b) Depletion of m<sup>6</sup>A actors by siRNA.** (a) Western blot analysis was performed to check the depletion of the m<sup>6</sup>A -related proteins. Representative of three independent experiments. (b) **Control of FTO depletion in 4 cell lines.** Pictures are representative of three experiments. (c - d) Establishment of stable cell lines. (c) Efficiently infected cells by sh-RNA retrovirus were sorted by FACS on the basis of GFP expression (CRC1 top, SW620 bottom). (d) Efficient FTO depletion was evaluated by immunoblot. (e) **Stable FTO silencing increases sphere forming potential of CRC cell lines.** Colonosphere number after FTO silencing in CRC1 (top) and SW620 (bottom) cell lines. Results represent mean +/- S.E.M of five experiments for CRC1 and three experiments for SW620. \*\* p-value < 0.01, Two-sided Unpaired T-test. (f) **FTO silencing does not affect cell proliferation.** Cell proliferation was measured every day for 4 days using sulforhodamine assay (CRC1 top, SW620 bottom). (g-h) **Stable FTO silencing increases CSC markers in SW620 cell line.** Number of ALDH (left) and CD44v6 (right) positive cells were assessed by Flow cytometry. Results are mean +/- S.E.M of three experiments. \* p-value < 0.05, Two-sided Unpaired T-test.

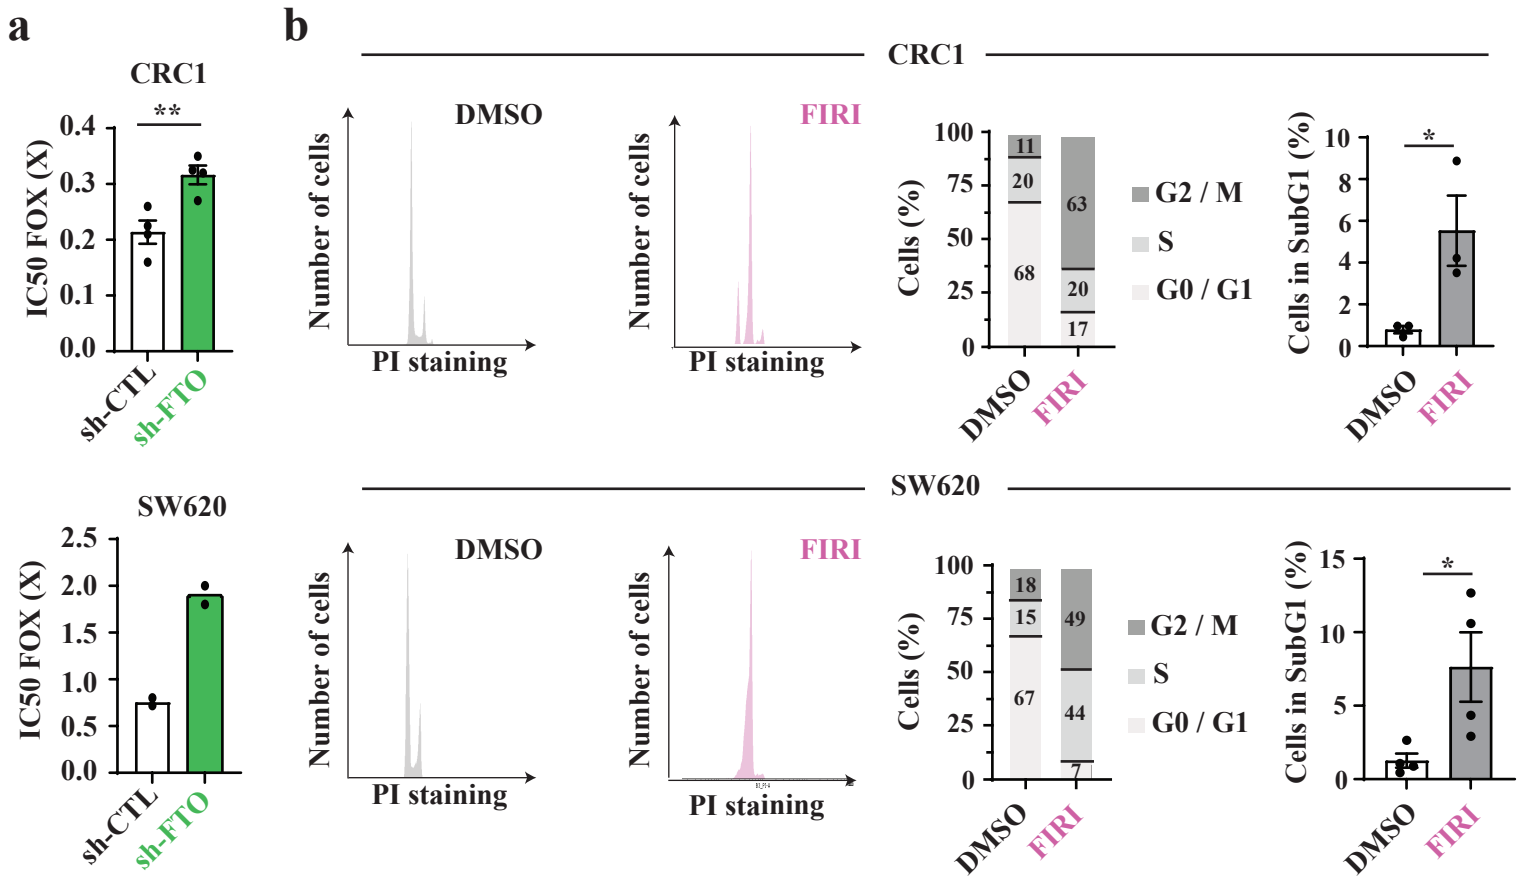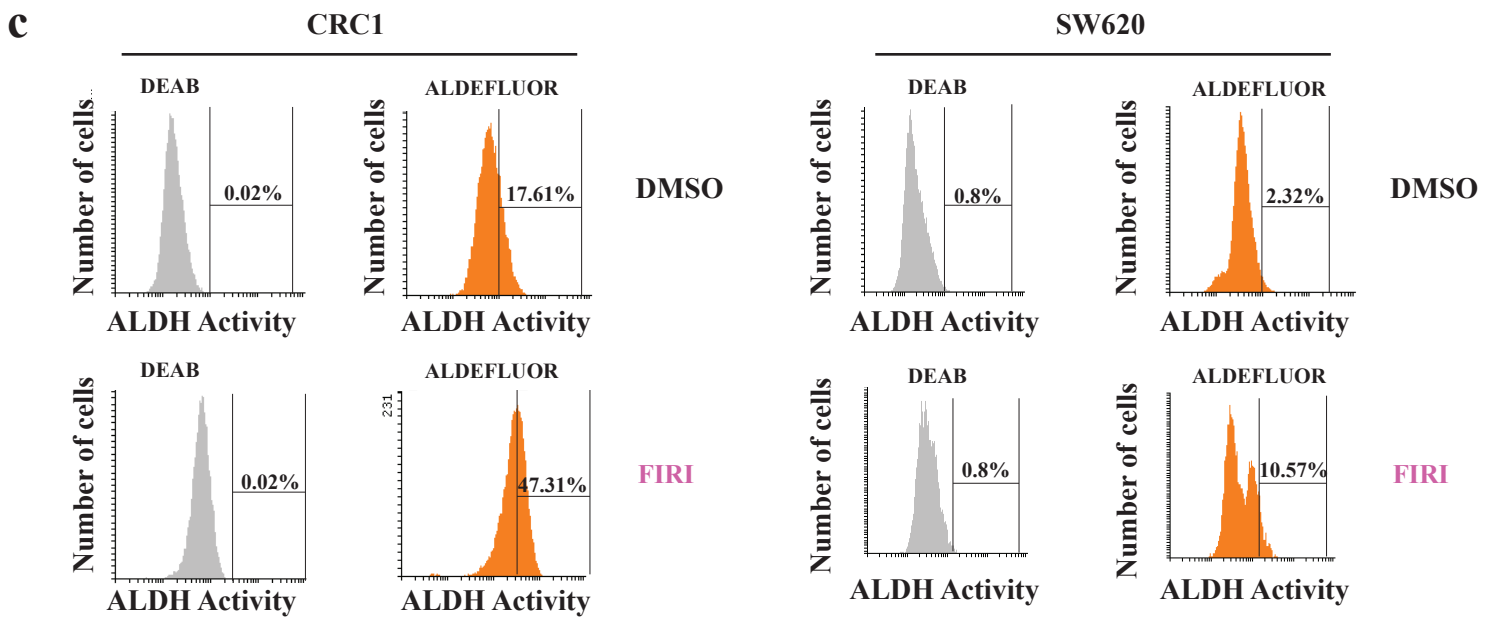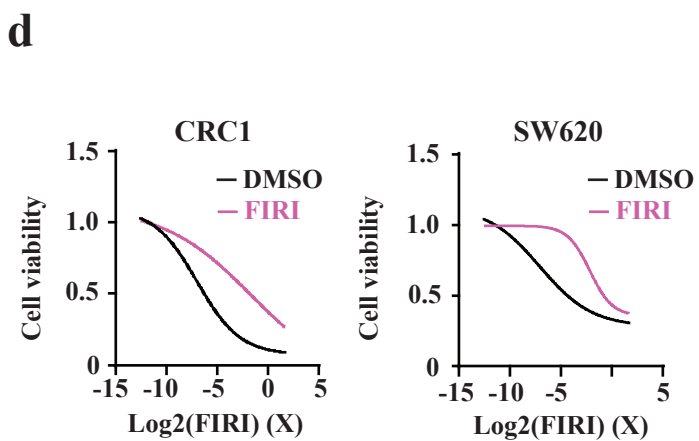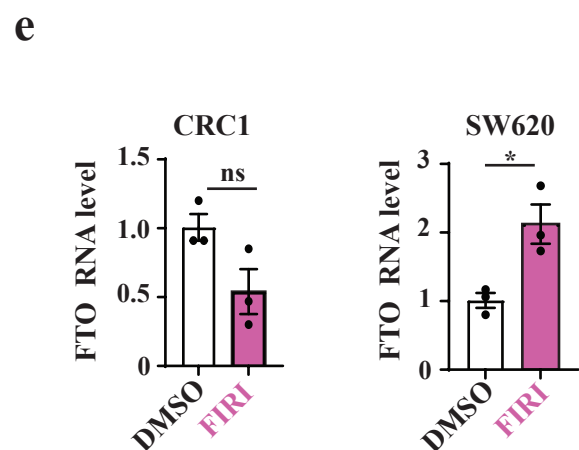

**Figure S2. (a) FTO silencing increases resistance to FOX.** Cell viability was measured upon exposure of cells to increasing dose of FOX (1 X = 50  $\mu$ M 5-FU and 1  $\mu$ M of oxaliplatin) in CRC1 (top) and SW620 (bottom). Results represent mean  $\pm$  S.E.M of four experiments (CRC1) or two experiments representative of three (SW620). \*\* p-value < 0.01, Two-sided Unpaired T-test. **(b) FIRI treatment blocks cell cycle in G2/M.** Cell cycle distribution was analyzed after FIRI pre-treatment at 0.2 X for 72 h in CRC1 (top) and SW620 (bottom). Cell events occurring before G0/G1 peak were considered as subG1. Bar plots represent mean  $\pm$  S.E.M of three (CRC1) and four experiments (SW620). \*p-value < 0.05, Two-sided unpaired T-test. Gating strategy is illustrated in Figure S8f and S8g **(c) FIRI treatment enriches cell population in ALDH positive cells.** Number of ALDH positive cells after 72 h of 0.2 X FIRI treatment in CRC1 (left) and SW620 (right). Representative of three biological replicates. Gating strategy is shown in Figure S8h and S8i **(d) FIRI treatment selects chemoresistant cells.** Measurement of FIRI toxicity on CRC1 (left) and SW620 (right) pre-treated with 0.2 X of FIRI for 72 h. Cell viability was measured upon exposure of cells to increasing dose of FIRI as in 2a after a first round of 0.2X FIRI pre-treatment for 72 h. Results show one experiment representative of three. **(e) FIRI treatment impact FTO transcripts level in a cell type dependent manner.** Transcript level of FTO was analyzed by RT-qPCR after 72 h of FIRI treatment at 0.2X in CRC1 (left) and SW620 (right). Bar plot represent mean  $\pm$  S.E.M of three biological replicates. ns = non significant, \*p-value < 0.05, Two-sided unpaired T-test.

**a**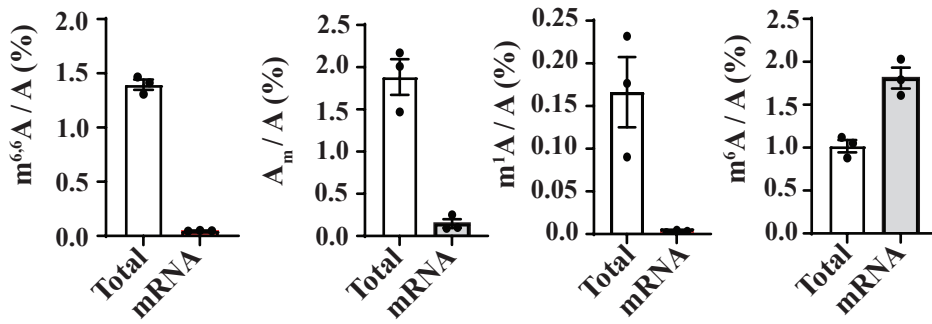**b**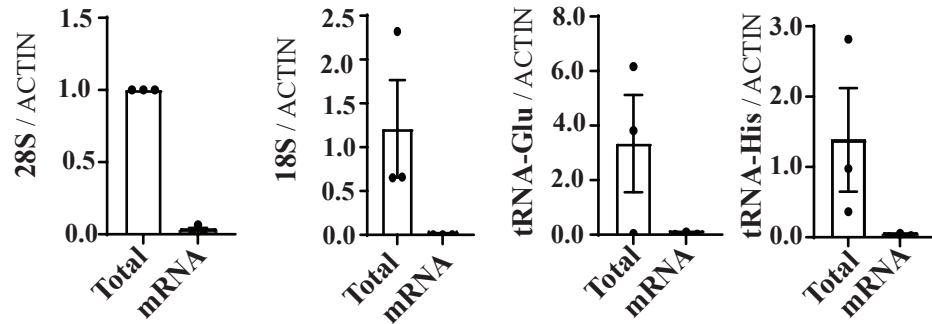**c**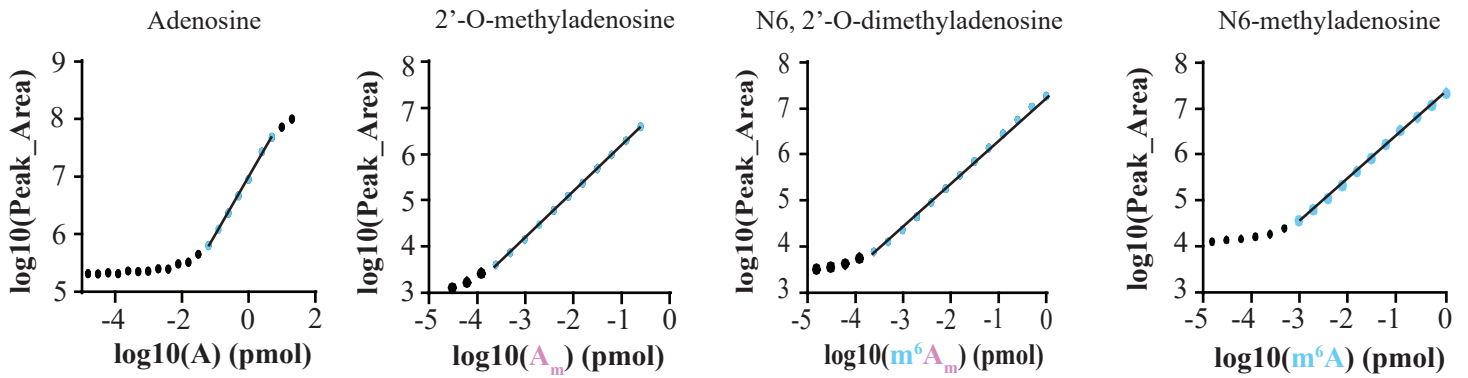**d**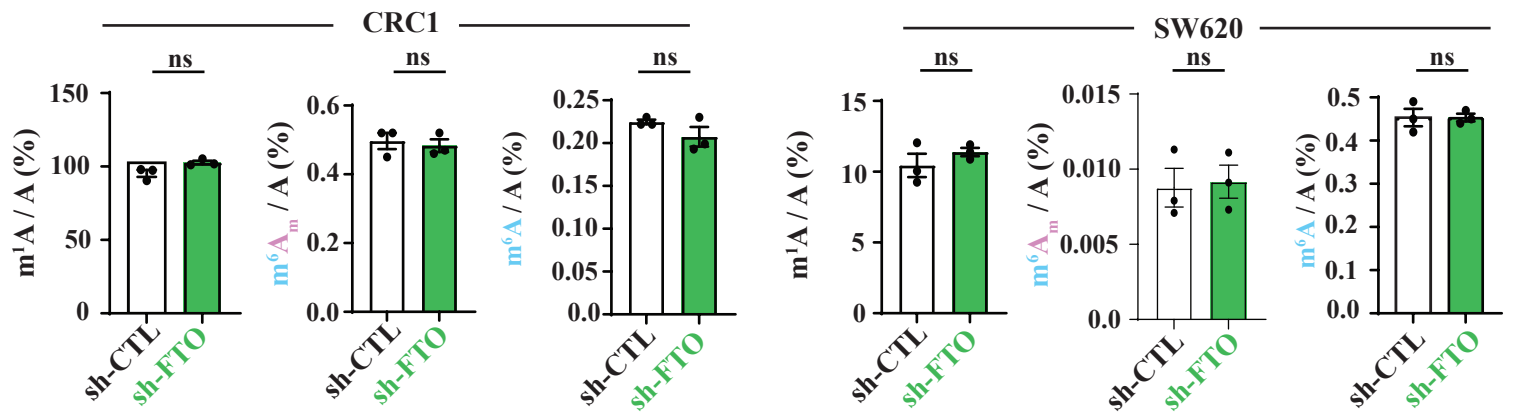

**Figure S3. (a) tRNA- and rRNA-enriched modifications sharply decrease upon mRNA purification.** Highly prevalent modifications in tRNA ( $m^1A$ ) and rRNA ( $m^{6,6}A$ ;  $A_m$ ) or mRNA ( $m^6A$ ) were quantified by mass-spectrometry from total RNA and polyA+ mRNA extracted from SW620 cell line to control for mRNA enrichment. Bar plots represent mean  $\pm$  S.E.M of three biological replicates. **(b) rRNA and tRNA level collapse after mRNA purification.** 28 S and 18 S rRNA, tRNA-Glu and tRNA-His levels were quantified by RT-PCR from “Total” RNA and polyA + “mRNA” extracted from SW620 cell line. Bar shows mean  $\pm$  S.E.M of 3 biological replicates. **(c) Quantifications of mRNA modifications by LC-MS/MS.** Standard curve of nucleosides standard A,  $m^6A_m$ ,  $A_m$  and  $m^6A$ . **(d) FTO silencing does not affect small RNA modifications.** Small RNA were purified from sh-FTO and sh-CTL cell line (CRC1 (left) and SW620 (right)) and RNA modifications were quantified by LC-MS/MS. Bar plots represent mean  $\pm$  S.E.M of three independent experiments. ns = not significant. Two sided Unpaired T-test.

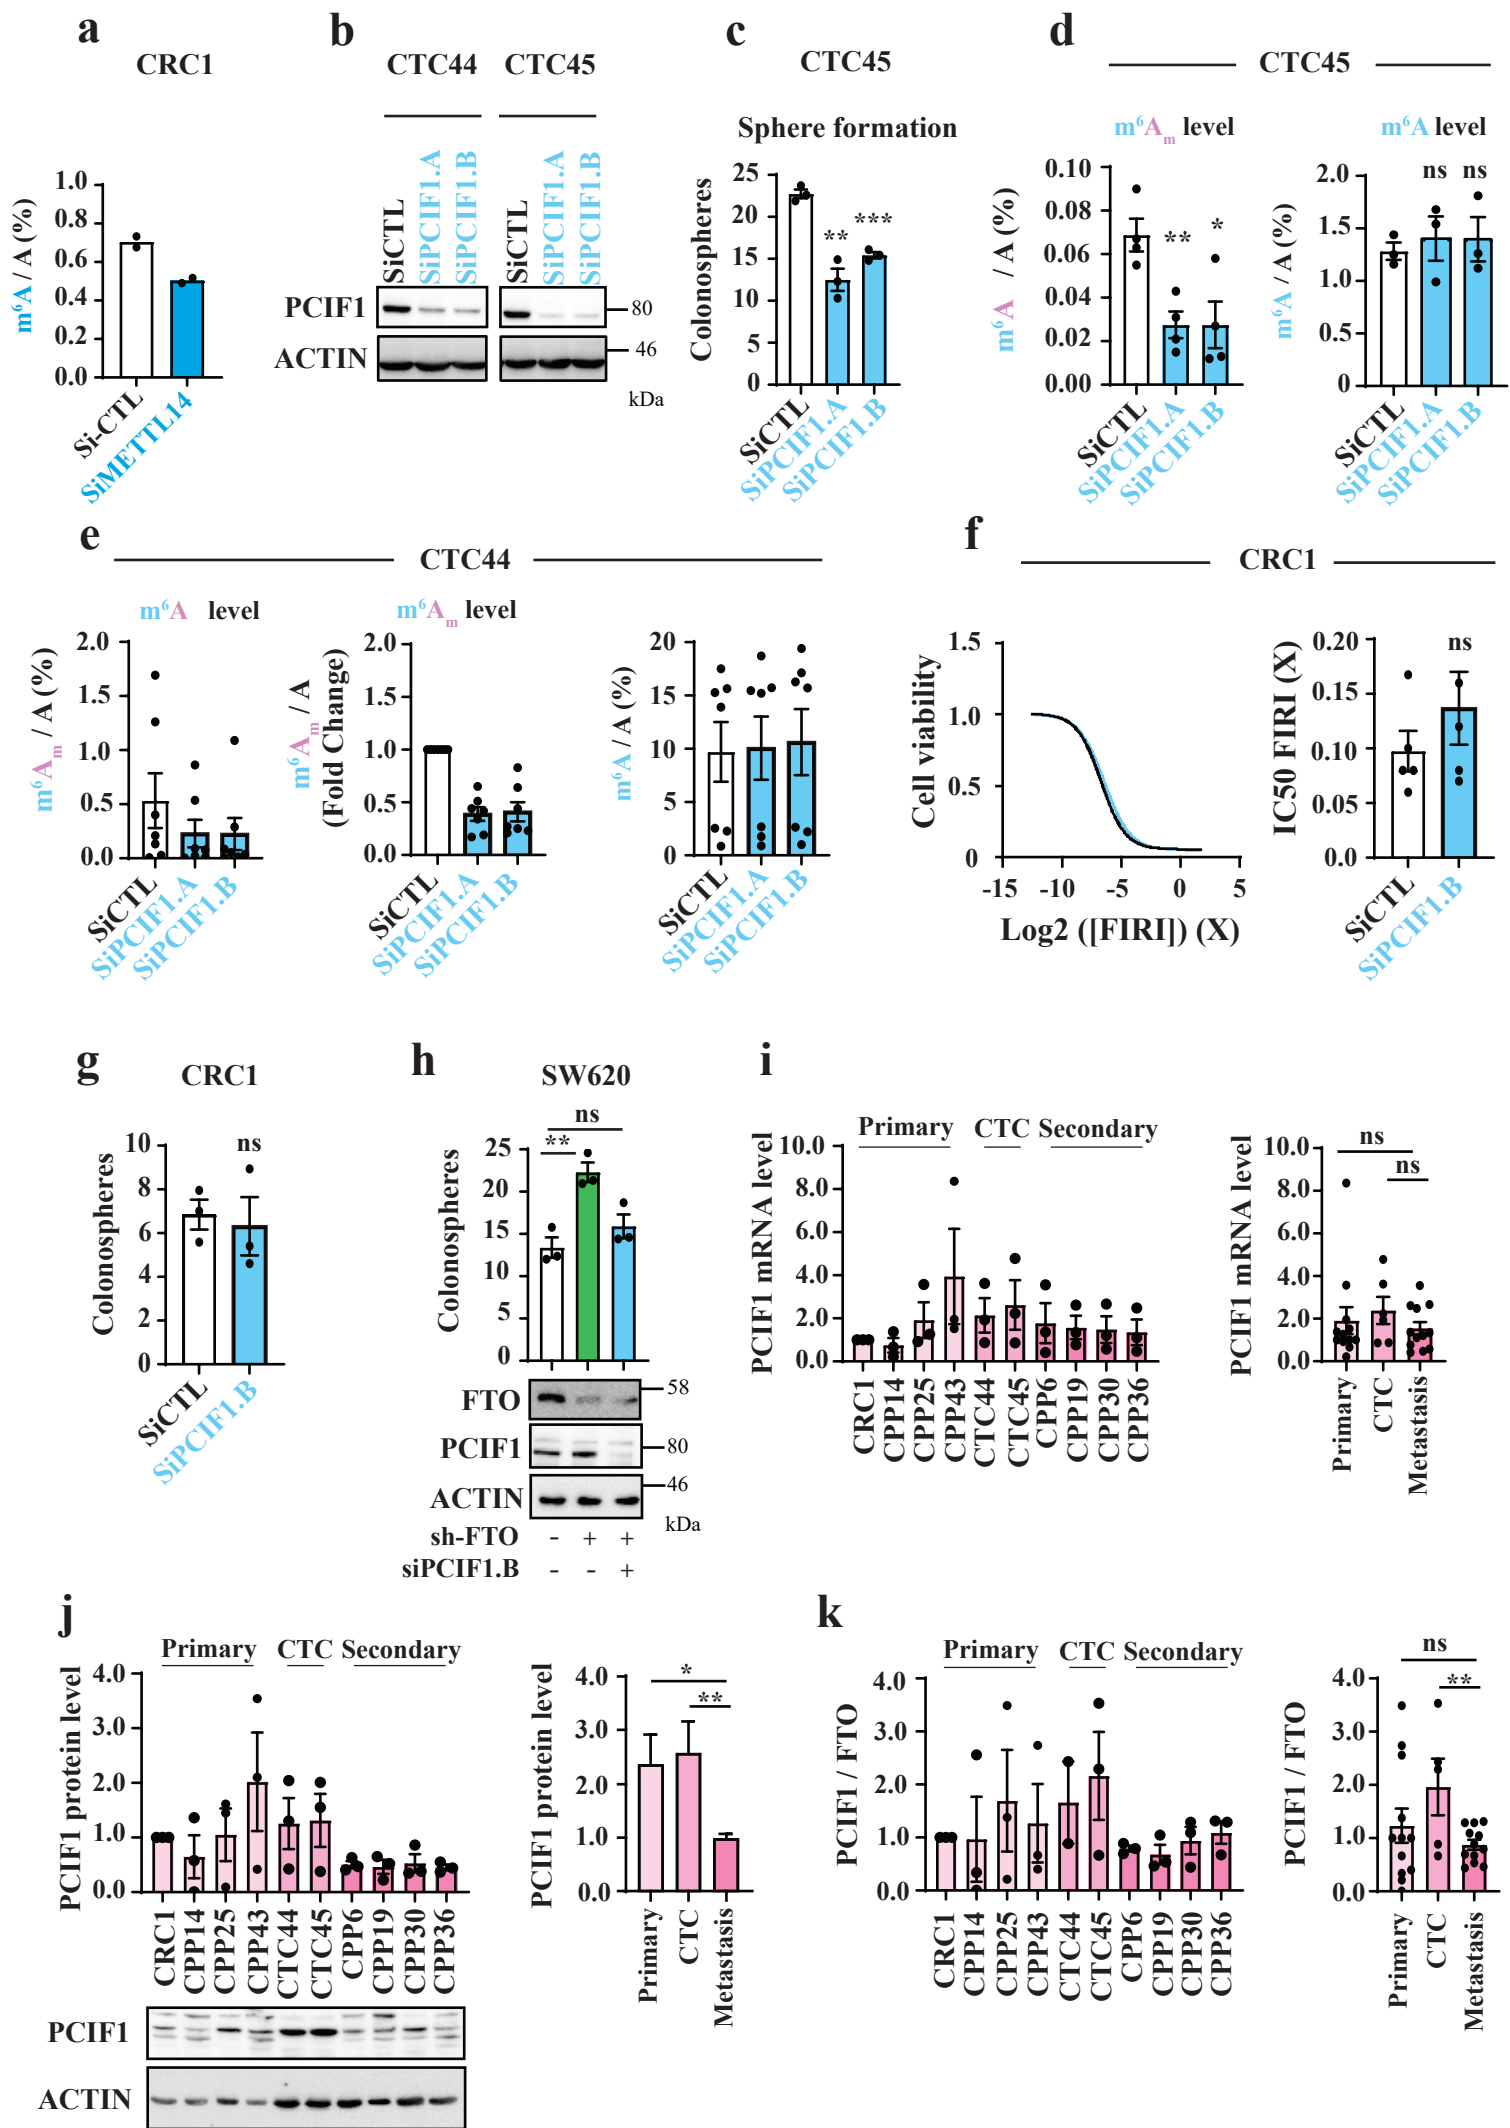

**Figure S4. (a) METTL14 knockdown significantly decrease m6A level.** m6A level of polyA + mRNA was analyzed by mass-spectrometry in CRC1 cell line. Result represents mean +/- S.E.M of two experiments. \*p-value < 0.05. Two sided Unpaired T-test **(b) Control of PCIF1 depletion.** PCIF1 expression was evaluated by immunoblot upon siRNA treatment in CTCs cell lines (CTC44 (left), CTC45 (right)). **(c) PCIF1 knockdown decreases sphere formation.** Sphere formation assay was performed after siRNA treatment targeting PCIF1 in CTC45 cell line. Bar plot represent mean +/- S.E.M of at least 3 biological replicates. \*\*\* p-value < 0.001, \*\* p-value < 0.01. Two sided unpaired T-test **(d) PCIF1 silencing decreases m6Am level in mRNA.** Quantification of polyA+ mRNA modification by mass-spectrometry upon silencing of PCIF1 in CTC45 cell line. Bar plot represents mean +/- S.E.M of at least three biological replicates. \*\*p-value < 0.01, \* p-value < 0.05, ns = not significant, Two-sided Unpaired T-test. **(e) PCIF1 knockdown decreases m6Am level in mRNA.** Quantification of polyA+ mRNA modification by mass-spectrometry upon silencing of PCIF1 in CTC44 cell line. Bar plot represents mean +/- S.E.M of seven biological replicates. \*\*p-value < 0.01, \* p-value < 0.05 Two-sided Unpaired T-test. **(f) PCIF1 knockdown does not affect resistance to FIRI treatment in CRC1.** Chemosensitivity to FIRI was assessed by treating siRNA treated CRC1 cell line with decreasing dose of drugs. IC50 was determined graphically. Bar plot represents mean +/- S.E.M of four biological replicates. ns = not significant, two-sided Unpaired T-test. **(g) PCIF1 knockdown does not affect sphere-forming ability in CRC1.** Sphere formation assay was performed after siRNA treatment targeting PCIF1 in CRC1 cell line. Bar plot represent mean +/- S.E.M of 3 biological replicates. ns = not significant, two-sided Unpaired T-test. **(h) PCIF1 knockdown rescues basal sphere formation in sh-FTO cell line.** Sphere formation was performed upon depletion of PCIF1 by siRNA treatment of both sh-CTL and sh-FTO SW620 cell lines. Bar plot represent mean +/- S.E.M of 3 biological replicates. Proteins depletion were assessed by western blot. \*\*p-value < 0.01, ns = not significant. One way Anova followed by multiple comparisons to sh-CTL. **(i) PCIF1 mRNA level does not change along with tumor progression.** PCIF1 mRNA level were analyzed by RT-PCR in various colon cancer cell lines that derived from primary tumor, liquid biopsies (CTC) and secondary tumor. Bar plot represent mean +/- S.E.M of PCIF1 transcript level per cell line or per group. ns = not significant, One way-Anova. **(j) PCIF1 protein level is decreased in metastatic cell line.** PCIF1 protein was quantified in patient derived cell line (same as in S5a) by western blot. Bar plot represents mean +/- S.E.M per cell line or per group. \*\*p-value < 0.01, ns = not significant. One-way Anova followed by multiple comparisons. **(k) The ratio PCIF1 / FTO is only increased in CTCs.** Quantification of the ratio of PCIF1 protein level and FTO protein level by western blot. Bar plot represents mean +/- S.E.M of three biological replicates.



**a**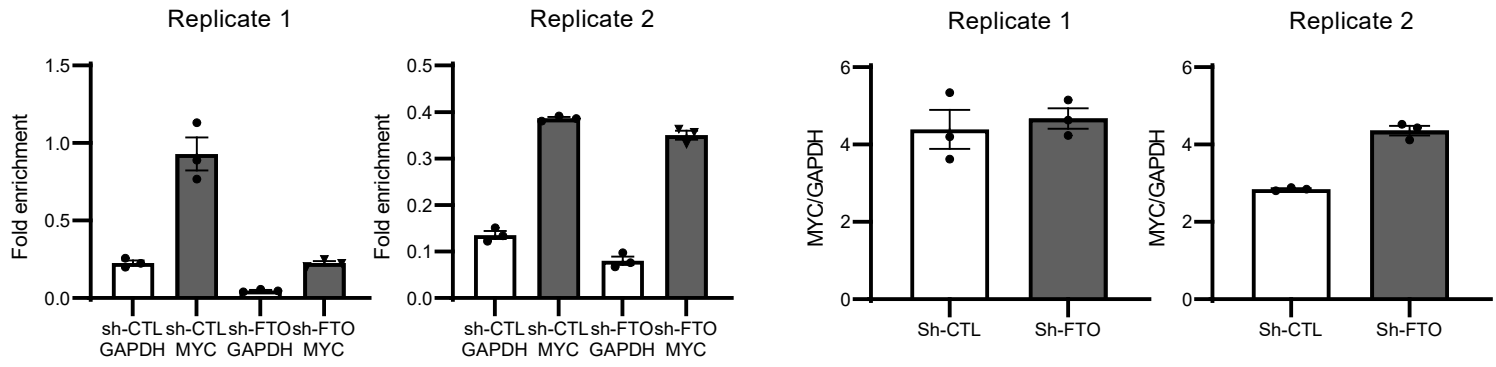**b**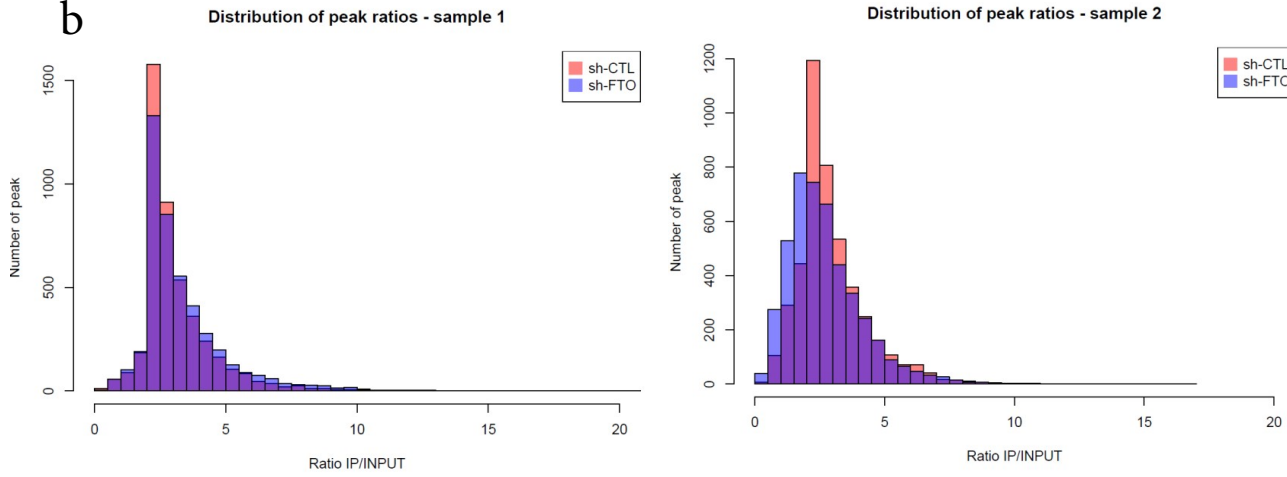**c****IP and INPUT levels**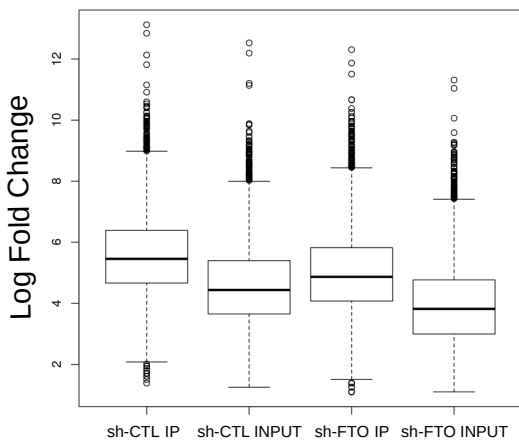**d****Metagene plot**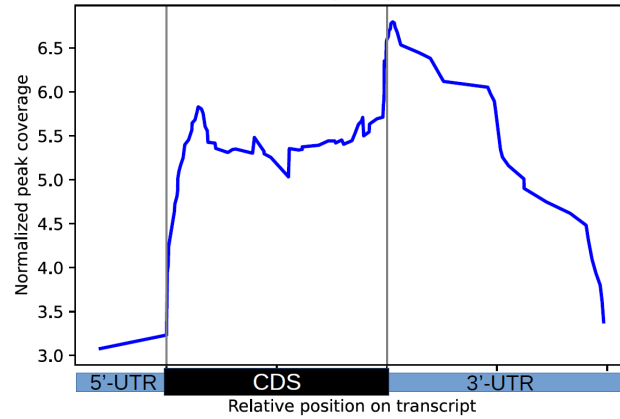**e****Peaks repartition**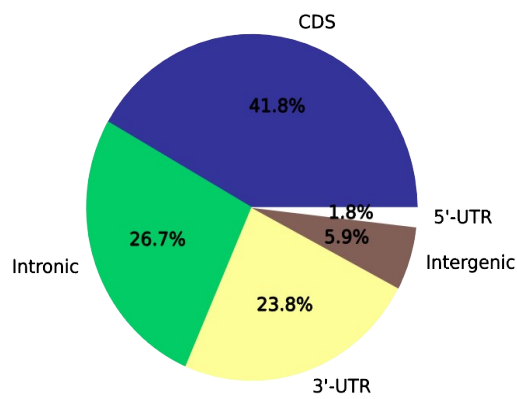**f****MYC transcript peaks repartition**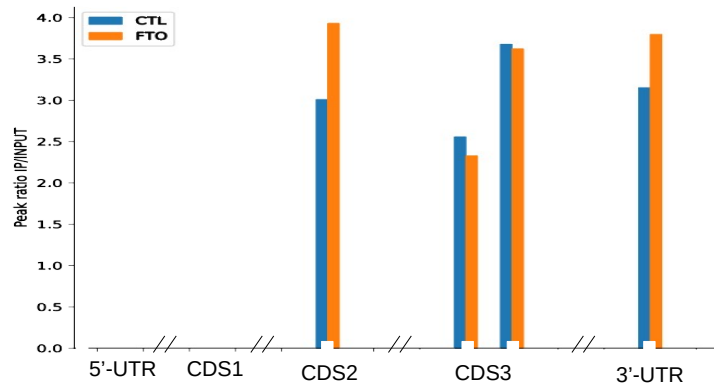

**Figure S5. (a) Quality control of MeRIP-seq procedure by RT-qPCR.** In the left panel, m6A immunoprecipitation (IP) is normalized by the input. In the right panel, m6A IP at MYC transcript is normalized by the input and represented relative to GAPDH. We have used MYC and GAPDH transcripts as positive and negative controls respectively. Bar plots represent mean  $\pm$  S.E.M of three technical replicates. N=2 biological replicates. **(b) Distribution of peak ratio IP/INPUT for replicate 1 and replicate 2 sh-CTL and sh-FTO.** Specific parts corresponding to detected peak are colored in red for sh-CTL and in blue for sh-FTO; common parts are colored in violet (red +blue). **(c) Boxplot of IP and INPUT levels for both replicates of sh-CTL and sh-FTO.** Each box represents the dispersion of log fold change level. The boundary of the box closest to zero indicates the 25th percentile, a black line within the box marks the median and the boundary of the box farthest from zero indicates the 75th percentile. Whiskers above and below the box indicate the 10th and 90th percentiles. IP samples are enriched in comparison to INPUT samples. IP samples are enriched in comparison to INPUT samples. N=2. **(d) Metagene plot illustrating m6A peak repartition for all identified genes within coding regions (CDS), 5'-UTR and 3'-UTR** (e) Percentage of m6A peak repartition for all identified genes, with CDS, 5'-UTR, 3'-UTR, intronic and intergenic parts. (f) m6A peak repartition for MYC gene for sh-CTL and sh-FTO along the transcript, comprising 5'-UTR, 3 CDS and 3'-UTR. N=2.

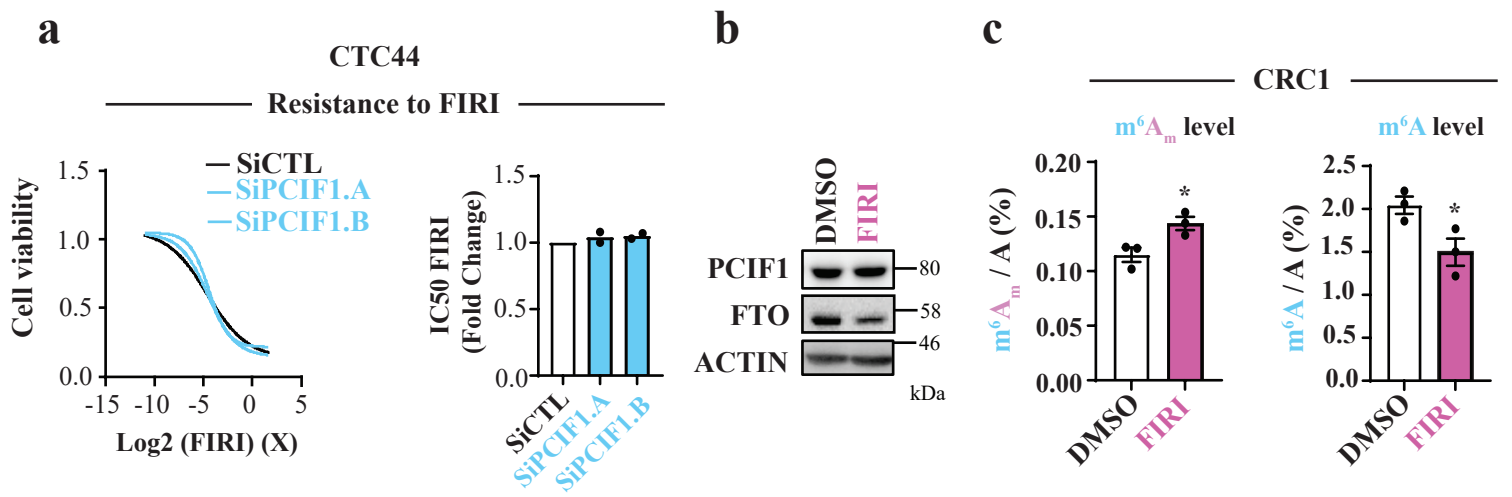

**Figure S6. (a) PCIF1 silencing does not impact chemoresistance in vitro.** Chemosensitivity to FIRI was assessed by treating siRNA treated CTC44 cell line with decreasing dose of drugs. IC<sub>50</sub> was determined graphically. Bar plot represents mean of two biological replicates. **(b) PCIF1 level is unchanged upon FIRI treatment.** Analysis of FTO and PCIF1 level by western blot after cell treatment by FIRI 0.2 X for 72 h in CRC1 cell line. Picture of FTO is the same as in Figure 2d and picture of PCIF1 is representative of three biological replicates. **(c) FIRI treatment increases m<sup>6</sup>Am level.** m<sup>6</sup>Am / A and m<sup>6</sup>A / A level were assessed by LC-MS/MS on polyA + mRNA from CRC1 cells either treated with 0.2X of FIRI for 72 h or treated with DMSO. Bar plots represent mean +/- S.E.M of three biological replicates. \*p-value < 0.05, ns = not significant, Two-sided Unpaired T-test.

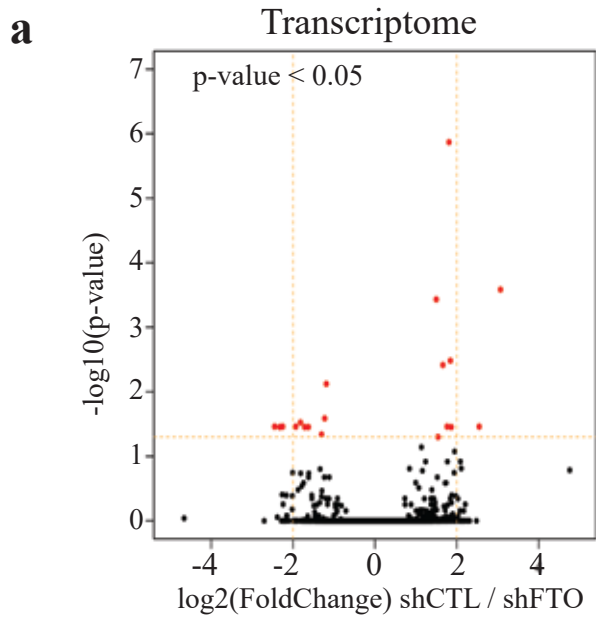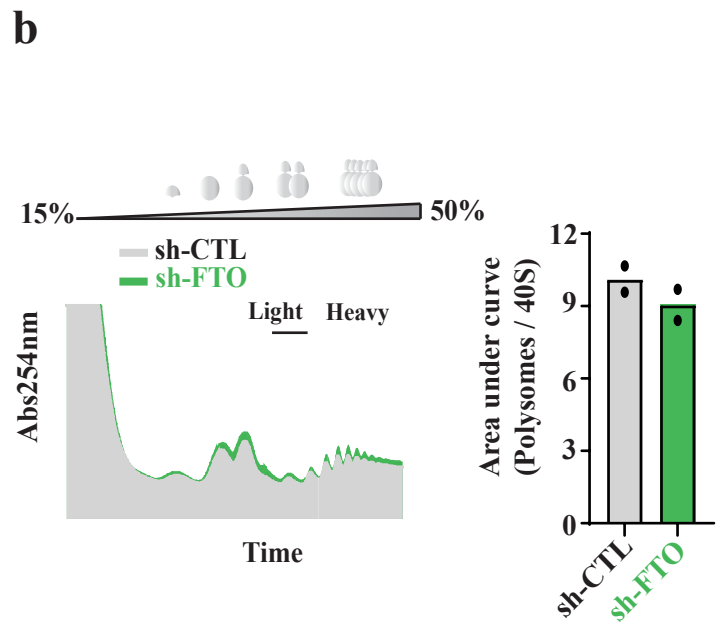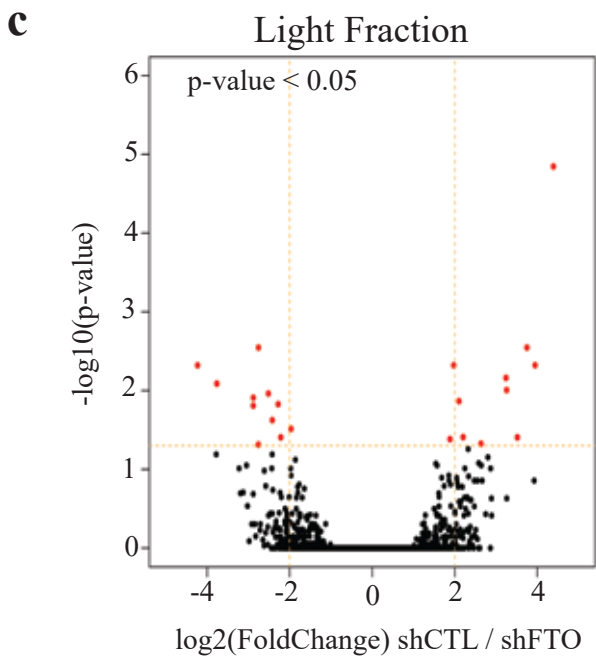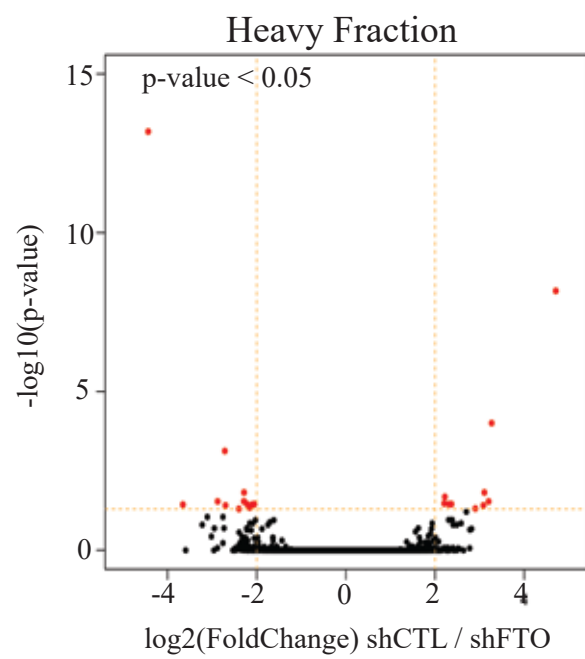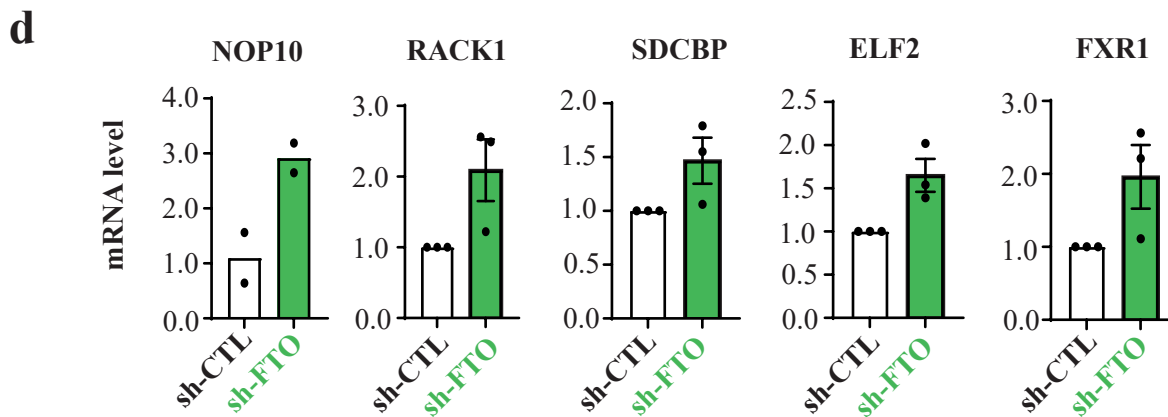

**Figure S7. FTO silencing does not trigger significant change of gene expression level. (a) FTO silencing does not affect global transcript level.** MA plot analyses of transcripts changes. Red dot represent transcripts with an adjusted p-value < 0.05. Pie Chart shows the percentage of transcripts with fold change > 2 or < 0.5; CRC1 line n = 3 individual experiments. **(b) FTO does not affect global translation activity. Polysome profile of sh-CTL and sh-FTO CRC1 cell lines.** Light fraction (1 to 3 ribosomes/mRNA) and heavy fractions are indicated. Bar plot represents polysome level quantification of three experiments. N=2 biological replicates. **(c) FTO silencing triggers very mild change of translation of specific mRNA.** MA plot analyses of transcripts changes in Light and Heavy fractions. Same representation as in (a); CRC1 line, n = 3. **(d) Validation of differentially expressed gene in translatoe data.** RT-PCR were performed on heavy fraction. Results show mean  $\pm$  S.E.M of three biological replicates or two representative of three (NOP10). For each gene, cycle threshold (ct) was normalized to ct of ACTIN. Dct were further normalized to dct of sh-CTL condition. \*p-value < 0.05, Two sided Unpaired T-test.

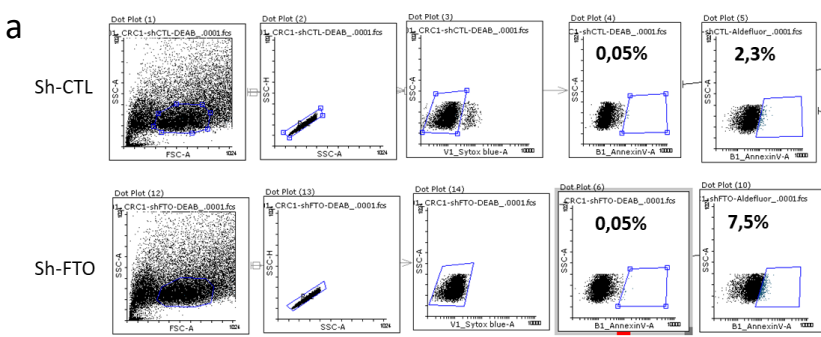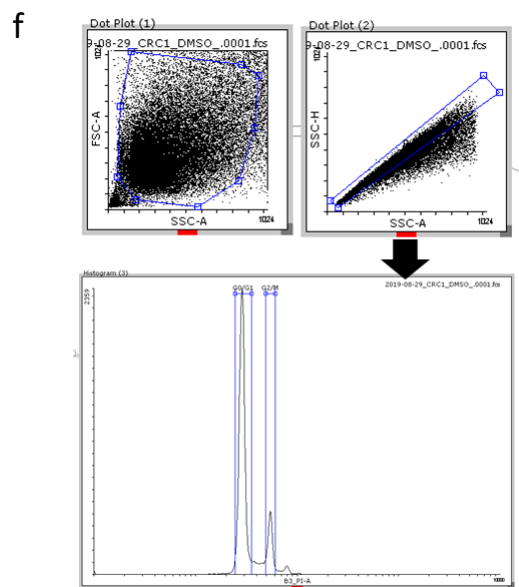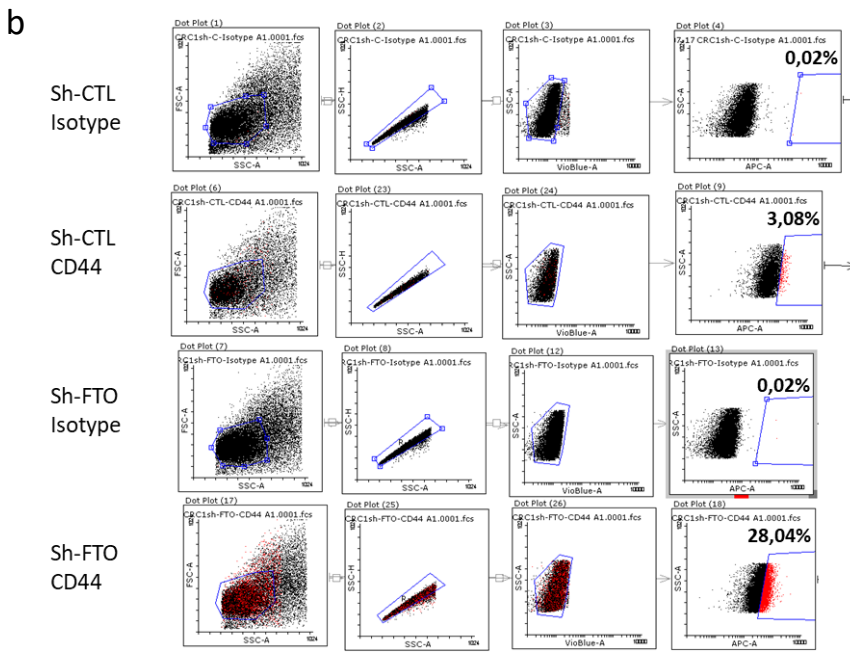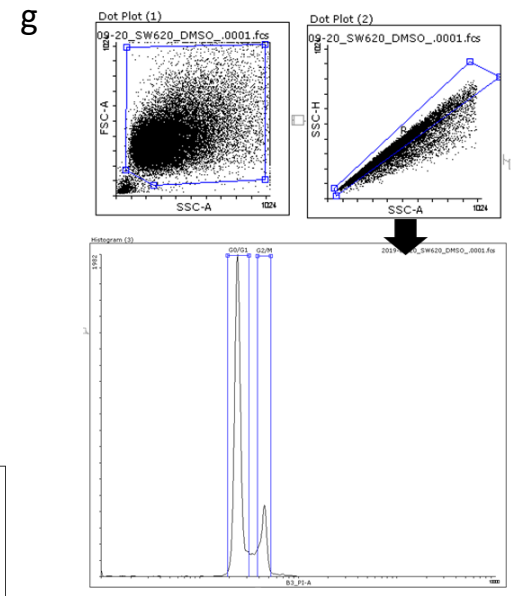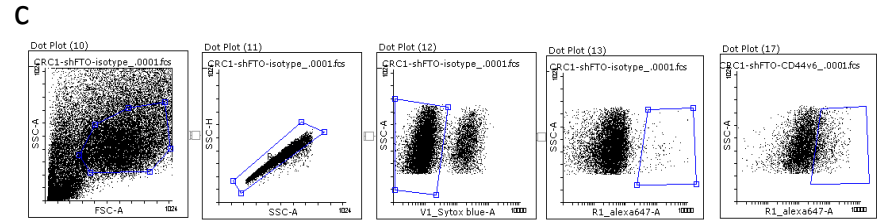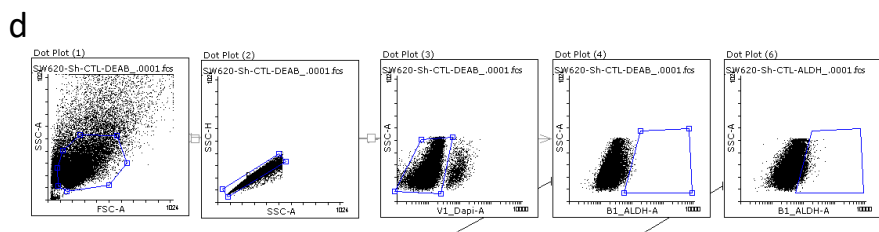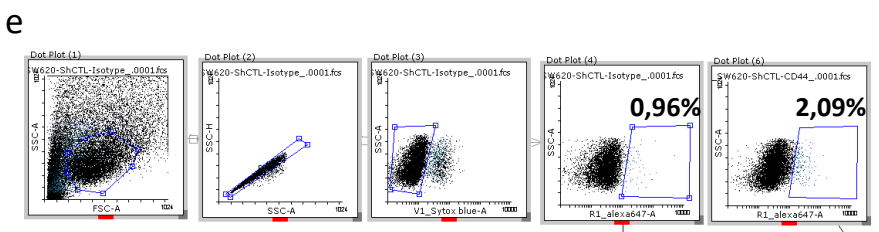

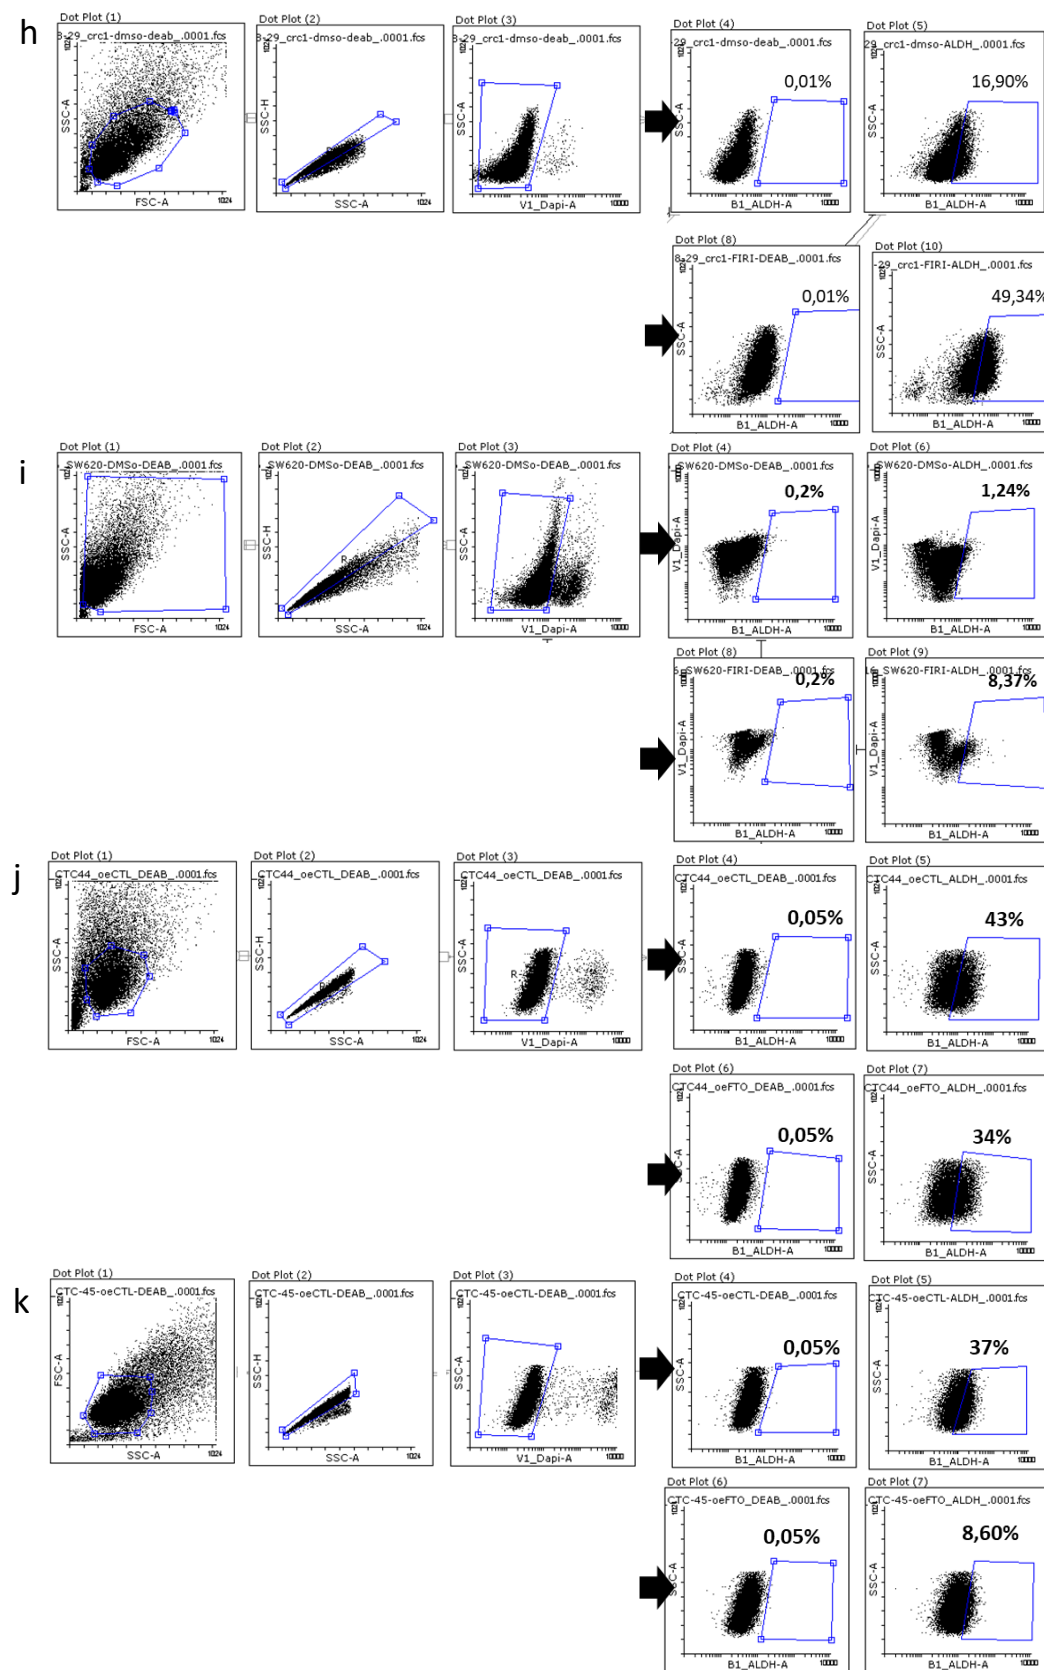

**Figure S8. Gating strategies.** (a) ALDH staining of CRC1 sh-CTL and shFTO ALDH cells (Figure 1e). (b) CD44 staining of CRC1 sh-CTL vs shFTO cells (Figure 1e). (c) CD44v6 staining of CRC1 sh-CTL vs shFTO cells (Figure 1e). (d) ALDH staining of SW620 (Figure S1g). (e) CD44 staining of SW620 sh-CTL vs shFTO cells (Figure S1h). (f) PI staining of CRC1 (Figure S2b). (g) PI staining of SW620 (Figure S2c). (h) ALDH staining of CRC1 DMSO vs CRC1 FIRI (Figure S2c). (i) ALDH staining of SW620 DMSO vs SW620 FIRI (Figure S2c). (j) ALDH staining of CTC44 oe-CTL (Figure 3e). (k) ALDH staining of CTC45 oe-CTL (Figure 3e).

**Table S1: list of primers**

| Primers                          | Sequence 5' – 3'       |
|----------------------------------|------------------------|
| FTO-Forward                      | ACTTGGCTCCCTTATCTGACC  |
| FTO-Reverse                      | TGTGCAGTGTGAGAAAGGCTT  |
| ACTIN-Forward                    | AGCACGGCATCGTCACCAACT  |
| ACTIN-Reverse                    | TGGCTGGGGTGTGAAGGTCT   |
| NOP10-Forward                    | AAACGCTTCAAGGTGCTCAT   |
| NOP10-Reverse                    | ACCATGATTGCCTCACACAA   |
| RACK1-Forward                    | TGAGTGTGGCCTTCTCCTCT   |
| RACK1-Reverse                    | GCTTGCAGTTAGCCAGGTTC   |
| SDCBP-Forward                    | TTCTGCTCTATCCCTCACG    |
| SDCBP-Reverse                    | CCAGTTACAGGAGCCACCAT   |
| ELF2-Forward                     | AGGGGAATTCTTGCAAAGGT   |
| ELF2-Reverse                     | ACACCCTTCTCTGCTCTGGA   |
| PIAS1-Forward                    | CCTGGGTTTGTCTGTCTGT    |
| PIAS1-Reverse                    | AGCTCAAGCATCCATCGACT   |
| 28S-Forward                      | CGACGTTGCTTTTTGATCCT   |
| 28S-Reverse                      | GCAACGACAAGCCATCAGTA   |
| 18S-Forward                      | TGTGCCGCTAGAGGTGAAATT  |
| 18S-Reverse                      | TGGCAAATGCTTTCGCTTT    |
| tRNA <sup>Glu</sup> -Forward     | CCTGGTGGTCTAGTGGCTAGGA |
| tRNA <sup>Glu</sup> -Reverse     | TCCCTGACCGGAATCGAA     |
| tRNA <sup>His</sup> -Forward     | GCC GTGATCGTATAGTGGT   |
| tRNA <sup>His</sup> -Reverse     | TGACTCGGATTCGAACCGA    |
| GAPDH-Forward                    | TGGTATCGTGAAGGACTCA    |
| GAPDH-Reverse                    | CCAGTAGAGGCAGGGATGAT   |
| MYC-Forward (m6A peak in 3'UTR)  | CATCAGCACAACTACGCAGC   |
| MYC- Reverse (m6A peak in 3'UTR) | GCTGGTGCATTTTCGGTTGT   |



**Table S2: list of antibodies**

| <b>Antibodies</b>     | <b>Manufacturers</b> | <b>References</b> | <b>Dilution</b> |
|-----------------------|----------------------|-------------------|-----------------|
| Anti-METTL3           | Abnova               | H00056339-B01P    | 1 : 500         |
| Anti-METTL14          | Sigma                | HPA038002         | 1 : 1,000       |
| Anti-WTAP             | Santa-Cruz           | Sc-374280         | 1 : 300         |
| Anti-YTHDF1           | Abcam                | ab99080           | 1 : 500         |
| Anti-YTHDF2           | ProteinTech          | 24744-1-AP        | 1 : 500         |
| Anti-ALKBH5           | Sigma                | HPA007196         | 1 : 1,000       |
| Anti-FTO              | Phosphosolution      | 597-FTO           | 1 : 1,000       |
| Anti-FTO              | AbCam                | EPR6895           | 1 : 1,000       |
| Anti-PCIF1            | ProteinTech          | 16082-1-AP        | 1 : 1,000       |
| Anti-ACTIN            | Sigma                | A5441             | 1 : 20,000      |
| Anti-CD44             | BD biosciences       | 59942             | 1 : 500         |
| Anti-CD44v6           | MyLtenyi Biotec      | 130-111-238       | 1 : 300         |
| anti-IgG2a            | BD biosciences       | 130-091-836       | 1 : 500         |
| REA-S control Isotype | MyLtenyi Biotec      | 130-104-614       | 1 : 300         |
| Anti-mouse IgG        | Santa-Cruz           | Sc-516102         | 1 : 10,000      |
| Anti-Rabbit IgG       | Cell Signaling       | 7074S             | 1 : 1,000       |

**Tables S3: list of si-RNAs**

| Target     | si-RNA sequence 5' – 3' |
|------------|-------------------------|
| si-METTL3  | CUGCAAGUAUGUUCACUAUGA   |
| si-METTL14 | AAGGAUGAGUAAUAGCUAAA    |
| si-WTAP    | AAGCUUUGGAGGGCAAGUACA   |
| si-YTHDF1  | CCGCGUCUAGUUGUUC AUGAA  |
| si-YTHDF2  | CAGGCUGGAGAAUACGACAA    |
| si-ALKBH5  | ACAAGUACUUCUUCGCGATT    |
| si-FTO#1   | AAAUAGCCGUCGUUGUGAGA    |
| si-FTO#2   | ACGAUUUGCCCGAACAUUA     |

**Table S4: significantly deregulated genes in transcriptome (sh-CTL vs sh-FTO)**

| ensembl_transcript_id | ensembl_gene_id | hgnc_symbol | baseMean    | log2FoldChange | padj      |
|-----------------------|-----------------|-------------|-------------|----------------|-----------|
| ENST00000379284.1     | ENSG00000145990 | GFOD1       | 78,77927178 | -2,45          | 3,45E-02  |
| ENST00000502871.5     | ENSG00000138756 | BMP2K       | 68,55905687 | -2,32          | 3,50E-02  |
| ENST00000560346.5     | ENSG00000137843 | PAK6        | 70,25170115 | -2,25          | 3,45E-02  |
| ENST00000613981.3     | ENSG00000276016 | ABR         | 345,208247  | -1,93          | 3,45E-02  |
| ENST00000553804.5     | ENSG00000135424 | ITGA7       | 55,07126719 | -1,82          | 2,98E-02  |
| ENST00000469698.5     | ENSG00000141698 | NT5C3B      | 79,73094196 | -1,71          | 3,50E-02  |
| ENST00000539396.5     | ENSG00000090372 | STRN4       | 53,85657803 | -1,63          | 3,50E-02  |
| ENST00000423729.2     | ENSG00000185818 | NAT8L       | 363,546431  | -1,30          | 4,55E-02  |
| ENST00000415298.5     | ENSG00000152056 | AP1S3       | 173,4381645 | -1,23          | 2,59E-02  |
| ENST00000296978.3     | ENSG00000164484 | TMEM200A    | 308,8592893 | -1,19          | 7,52E-03  |
| ENST00000268349.7     | ENSG00000140718 | FTO         | 273,6964792 | 1,14           | 0,06      |
| ENST00000358075.10    | ENSG00000102158 | MAGT1       | 948,4366512 | 1,50           | 3,71E-04  |
| ENST00000540441.6     | ENSG00000166783 | MARF1       | 77,00415504 | 1,54           | 5,00E-02  |
| ENST00000453408.7     | ENSG00000141503 | MINK1       | 106,3068925 | 1,66           | 3,82E-03  |
| ENST00000635816.1     | ENSG00000107779 | BMPR1A      | 236,814228  | 1,76           | 3,45E-02  |
| ENST00000369409.9     | ENSG00000092621 | PHGDH       | 346,5642954 | 1,81           | 1,351E-06 |
| ENST00000508376.6     | ENSG00000134982 | APC         | 316,6998041 | 1,85           | 3,28E-03  |
| ENST00000551775.5     | ENSG00000196531 | NACA        | 35,05782626 | 1,86           | 3,50E-02  |
| ENST00000645393.1     | ENSG00000197467 | COL13A1     | 27,78249527 | 2,55           | 3,45E-02  |
| ENST00000620953.2     | ENSG00000274081 | PUF60       | 141,1437039 | 3,06           | 2,60E-04  |

**Table S5: significantly deregulated genes in light polysome (sh-CTL vs sh-FTO)**

| ensembl_transcript_id_gene | ensembl_gene_id | hgnc_symbol | BaseMean    | log2FoldChange | padj       |
|----------------------------|-----------------|-------------|-------------|----------------|------------|
| ENST00000473095,1          | ENSG00000106153 | CHCHD2      | 259,73024   | -4,23          | 0,00476437 |
| ENST00000573001,5          | ENSG00000006327 | TNFRSF12A   | 265,6137962 | -3,77          | 0,0081455  |
| ENST00000511295,1          | ENSG00000164109 | MAD2L1      | 115,7058686 | -2,88          | 0,01551306 |
| ENST00000396296,7          | ENSG00000136758 | YME1L1      | 84,88862546 | -2,88          | 0,01228001 |
| ENST00000540297,6          | ENSG00000166598 | HSP90B1     | 109,8066838 | -2,76          | 0,04842021 |
| ENST00000546921,1          | ENSG00000170421 | KRT8        | 58,98741964 | -2,76          | 0,0028436  |
| ENST00000426663,1          | ENSG00000117475 | BLZF1       | 64,45441125 | -2,52          | 0,01087912 |
| ENST00000578758,5          | ENSG00000108654 | DDX5        | 180,4850595 | -2,42          | 0,02370278 |
| ENST00000440865,2          | ENSG00000153187 | HNRNPU      | 260,0176582 | -2,28          | 0,01486871 |
| ENST00000531140,1          | ENSG00000109929 | SC5D        | 96,40538527 | -2,22          | 0,03923588 |
| ENST00000583036,5          | ENSG00000265681 | RPL17       | 1353,617173 | -1,97          | 0,03056144 |
| ENST00000472729,1          | ENSG00000173163 | COMMD1      | 147,8102686 | 1,89           | 0,04127679 |
| ENST00000395577,2          | ENSG00000100526 | CDKN3       | 615,3449577 | 1,98           | 0,00476437 |
| ENST00000442660,5          | ENSG00000159147 | DONSON      | 132,045702  | 2,10           | 0,01363747 |
| ENST00000614778,4          | ENSG00000249915 | PDCD6       | 536,122248  | 2,20           | 0,03899492 |
| ENST00000361166,8          | ENSG00000186575 | NF2         | 151,0018483 | 2,64           | 0,04710098 |
| ENST00000426073,6          | ENSG00000102606 | ARHGEF7     | 243,2549723 | 3,24           | 0,00688657 |
| ENST00000515539,5          | ENSG00000145781 | COMMD10     | 71,24704077 | 3,26           | 0,00983477 |
| ENST00000483423,5          | ENSG00000223766 | PRR3        | 35,70491387 | 3,52           | 0,03923588 |
| ENST00000487302,3          | ENSG00000233564 | PRR3        | 35,70491387 | 3,52           | 0,03923588 |
| ENST00000529725,1          | ENSG00000213445 | SIPA1       | 35,922234   | 3,75           | 0,0028436  |
| ENST00000582770,6          | ENSG00000105655 | ISYNA1      | 117,7625859 | 3,95           | 0,00476142 |
| ENST00000604351,5          | ENSG00000196422 | PPP1R26     | 142,5128676 | 4,39           | 1,42E-05   |

**Table S6: significantly deregulated genes in heavy polysome (sh-CTL vs sh-FTO)**

| ensembl_transcript_id | ensembl_gene_id | hgnc_symbol | baseMean    | log2FoldChange | padj        |
|-----------------------|-----------------|-------------|-------------|----------------|-------------|
| ENST00000557912,1     | ENSG00000182117 | NOP10       | 426,0909514 | -4,43          | 6,56E-14    |
| ENST00000507000,5     | ENSG00000204628 | RACK1       | 169,8339352 | -3,66          | 0,036224085 |
| ENST00000468861,5     | ENSG00000114416 | FXR1        | 334,0809707 | -2,88          | 0,028827874 |
| ENST00000522610,5     | ENSG00000070501 | POLB        | 219,1002589 | -2,71          | 0,000743499 |
| ENST00000424270,6     | ENSG00000137575 | SDCBP       | 255,1401181 | -2,70          | 0,03835289  |
| ENST00000577650,5     | ENSG00000141526 | SLC16A3     | 280,8281468 | -2,40          | 0,049456175 |
| ENST00000315741,5     | ENSG00000122406 | RPL5        | 1106,973304 | -2,29          | 0,028827874 |
| ENST00000373632,8     | ENSG00000118705 | RPN2        | 57,33589018 | -2,29          | 0,015093056 |
| ENST00000544233,5     | ENSG00000176871 | WSB2        | 66,42820584 | -2,28          | 0,028827874 |
| ENST00000438908,5     | ENSG00000230230 | TRIM26      | 163,5899189 | -2,16          | 0,045213002 |
| ENST00000578804,5     | ENSG00000108654 | DDX5        | 135,056588  | -2,10          | 0,036224085 |
| ENST00000319980,10    | ENSG00000032742 | IFT88       | 57,39826553 | -2,05          | 0,035151201 |
| ENST00000593027,6     | ENSG00000105677 | TMEM147     | 231,1540574 | 2,21           | 0,033499831 |
| ENST00000472481,5     | ENSG00000142541 | RPL13A      | 3916,00591  | 2,22           | 0,020845154 |
| ENST00000545237,1     | ENSG00000033800 | PIAS1       | 48,03035127 | 2,31           | 0,035151201 |
| ENST00000442386,5     | ENSG00000143727 | ACP1        | 974,4346148 | 2,37           | 0,035151201 |
| ENST00000568146,1     | ENSG00000140939 | NOL3        | 119,4543559 | 2,90           | 0,048460803 |
| ENST00000394235,6     | ENSG00000109381 | ELF2        | 31,63957441 | 3,08           | 0,03835289  |
| ENST00000518015,5     | ENSG00000132912 | DCTN4       | 24,28381223 | 3,11           | 0,015093056 |
| ENST00000491937,6     | ENSG00000171863 | RPS7        | 1403,902944 | 3,20           | 0,028827874 |
| ENST00000527361,5     | ENSG00000121753 | ADGRB2      | 68,93376841 | 4,71           | 6,80E-09    |

**Table S7: HOMER results: the three most significant motif detected by Homer on the sequences of MERIP peaks. The first motif contains the DRACH motif for m6A sites.**

| Rk | Motif   | P-val | Info. Content | Nb targets | % Targets | % Background | Motif Logo                                                                          |
|----|---------|-------|---------------|------------|-----------|--------------|-------------------------------------------------------------------------------------|
| 1  | RWGGACT | 1e-78 | 1.828         | 2045       | 59.46%    | 43.47%       |  |
| 2  | GTTCTTC | 1e-58 | 1.572         | 2191       | 63.71%    | 49.97%       |  |
| 3  | CATCGTC | 1e-48 | 1.743         | 1215       | 35.33%    | 24.08%       |  |

**Table S8: summary of MeRIP-seq results (IP vs INPUT for sh-CTL and sh-FTO samples)**

| Comparisons                          | IP vs INPUT | Normalized peak enrichment sh-CTL (mean ratio IP/INPUT +/- SE) | Normalized peak enrichment sh-FTO (mean ratio IP/INPUT +/- SE) |
|--------------------------------------|-------------|----------------------------------------------------------------|----------------------------------------------------------------|
| Number of peaks found in known genes | 3 458       | 2.98 +/- 0.023                                                 | 3.03 +/- 0.026                                                 |
| Number of corresponding genes        | 1 530       |                                                                |                                                                |
| Number of intergenic peaks           | 217         | 2.95 +/- 0.13                                                  | 2.75 +/- 0.19                                                  |
| Number of unknown peaks              | 832         | 3.04 +/- 0.05                                                  | 2.98 +/- 0.05                                                  |

## **Supplementary Methods**

### **Cell cycle analysis**

Cell pellets of one million of cells were left on ice for 30 min. Then cells were resuspended in 500  $\mu$ L of propidium iodide staining buffer (0.1 % of Triton X-100, 0.2 mg / mL Propidium Iodide (ThermoFisher Scientific)). After one night of incubation at 4 °C in dark, cell cycle was analyzed using MACSQuant flow cytometer.

### **RNA purification**

mRNA was purified from total RNA with 2 rounds of GeneElute mRNA purification kit (Sigma). rRNA was removed using Ribominus kit (Invitrogen) according to the manufacturer's instructions. Small RNA were purified from total using miRVANA kit according to the manufacturer's instructions (Invitrogen)

### **MeRIP-sequencing**

#### **RNA fragmentation and purification**

5  $\mu$ g of mRNA were fragmented (Invitrogen AM8740) by adding 1  $\mu$ L of 10X fragmentation reagent to 9  $\mu$ L mRNA and incubated at 95°C for 1 min. The same samples were then pooled prior to overnight EtOH precipitation (0.1 volume of 3M sodium acetate pH5.2, 2.5 volume of pure EtOH, 1  $\mu$ L glycogen). The fragmented mRNA were recovered by centrifugation at 14,000rpm 25 min at 4°C and the pellets were washed once with 70% EtOH and centrifuged again 14,000rpm 10 min at 4 °C. The pellets were resuspended in 429  $\mu$ L DEPC water and 390  $\mu$ L was used for m<sup>6</sup>A-methylated RNA immunoprecipitation and 39  $\mu$ L for inputs (10%).

#### **RNA immunoprecipitation**

390  $\mu$ L of fragmented mRNA was diluted with 100  $\mu$ L of 5X IP buffer (250mM Tris pH7.4, 500mM NaCl, 0.25% NP-40) and incubated with 2x(quantity of mRNA)  $\mu$ g of m6A antibody (ab151230) in presence of RNase inhibitors, for 3 hrs at 4°C. 30  $\mu$ L of prewashed Surebeads Protein A magnetic beads (BioRad) were added and incubated for 2 hrs at 4°C. The beads were then washed twice with high-salt IP buffer

(50mM Tris pH7.4, 1M NaCl, 1mM EDTA, 1% NP-40), twice with 1X IP buffer and finally once with high-salt IP buffer.

### **RNA isolation**

200  $\mu$ L of PK buffer (100mM Tris-HCl pH7.5, 50mM NaCl, 10mM EDTA) and 10  $\mu$ L of Proteinase K (Invitrogen AM2548) were added to the beads and incubated at 1,100rpm for 20 min at 55°C. A second elution was performed at 1,100rpm for 10 min at 55°C and pooled with the first eluates. To isolate RNAs, 1:1 Phenol:Chloroform was added and incubated at 1,100rpm for 5 min at 30°C. The aqueous phase containing the RNA and the inputs were EtOH precipitated overnight and recovered to an equal final volume of 16  $\mu$ L.  $\frac{1}{4}$  of the RNA were used for RT-qPCR (see below) and 10  $\mu$ L were subjected to sequencing.

### **RT-qPCR**

To validate the IP, RT-qPCR of inputs mRNA and immunoprecipitated mRNA was performed. The RNA were reverse transcribed using the VILO Superscript (Invitrogen™ 11755050) according to the manufacturer's instructions. qPCRs were performed using primers for GAPDH, known not to be m6A modified, and for MYC 3'UTR.

### **Primers for qPCR**

GAPDH\_Fwd TGGTATCGTGGAAGGACTCA

GAPDH\_Rev CCAGTAGAGGCAGGGATGAT

MYC\_Fwd (m6A peak in 3'UTR) CATCAGCACAACACTACGCAGC

MYC\_Rev (m6A peak in 3'UTR) GCTGGTGCATTTTCGGTTGT

### **Sequencing**

Multiplex cDNA Library was produced using NEBNext Small RNA Library Prep Set for Illumina (NE Biolabs<sup>Inc</sup> E7330S), according to manufacturer procedure. Sequencing was performed using NextSeq 500.

### **Me-RIP Analysis**

MeRIP-seq libraries read quality were assessed using FastQC v0.11.5 (Babraham Institute, Cambridge, UK) and adaptors were filtered using cutadapt v2.10 [1]. Ribosomal RNAs were discarded using SortMeRNA v2.1b [2]. High quality reads were then aligned on the *Homo sapiens* reference genome version GRCh38 using CRAC v2.5 (ATGC, LIRMM, FR). Alignment files were indexed using Samtools v1.9 [3]. Detection of m6A peak enrichment and statistical analysis were performed using m6aViewer (University of Leeds, Leeds, UK) [4]. Duplicate reads and read not in a proper pairs were discarded from the analysis using options of m6aViewer. Primary risk of probabilities to false discovery fold change was corrected by Benjamini and Hochberg multiple test adjustment. Corrected p-values < at 0.05 % were kept. Gene identifications were performed with biomaRt R package [5]. Functional annotations were performed with online program Panther v.15.0 [6]. Graphics were realized using R software [7] and Pandas python library [8].

To validate MERIP sequencing experiment, we applied the motif inference tool, Homer [homer], on all peaks that are differentially enriched between IP and Input. We sought motifs of length 7, without mismatches; the entire sequence from the peak region is considered (we did not restrict the analysis to shorter windows centered around the peak maximum height). The most significant motif reported by Homer with a P-value of 1e-78 is RWGGACT, which matches the DRACH motif on its last position (GGACT) (Table S7). In our condition, the Homer motif is highly specific, as seen on the logo and on its average information content per position (1.82 bits, with a maximum of 2 bits per position); this motif matches 59% (2045) of target sequences. When Homer was run, with one mismatch allowed, for length 6 or 7, the same motif remains significant and appears as number 2 in the Homer list, showing that the motif is robust to variations of Homer parameters.

### **Transcriptome Analysis.**

Total RNA was extracted using TRIzol method. RNA samples were sent to Eurofins Genomics /GATC to perform next generation sequencing on Illumina platform.

### **Polysome fractionation.**

This procedure was performed as previously described [9]. Briefly, 6 plates (150 cm<sup>2</sup>) were seeded with 2 x 10<sup>6</sup> cells. After 72 h, cells were treated with 20 µg / ml emetine for 5 min at 37°C, washed twice with ice-cold PBS, and scraped in ice cold PBS. Cells were centrifuged, resuspended into 1mL of polysome lysis buffer, homogenized by hard shaking with 1,4mm ceramix spheres (Lysing matrix D MPBio) in FastPrep machine (MPBio), centrifuges 10 min at full speed at 4°C. Lysates were loaded on 15-50% sucrose gradient and centrifuged at 35,000 rpm for 2.5 h at 4°C in a SW41 rotor (Beckman Coulter). Polysomes were separated through a live optical density (OD) 254 nm UV spectrometer and collected with an ISCO (Lincoln, NE) density gradient fractionation system. The absorbance at 254 nm was measured continuously as a function of gradient depth.

### **Translatome Analysis.**

mRNA associated with 1 to 3 ribosomes “Light polysomes” and mRNA associated with more than 3 ribosomes “Heavy polysomes” were extracted using TRIzol LS (Invitrogen) according to manufacturer’s instructions. Library preparation was performed using TruSeq Stranded mRNA Sample Preparation kit (Illumina) according to the manufacturer’s protocol. cDNA libraries were sequenced using the sequencer HiSeq 2500 (Illumina).

### **Bioinformatic pipeline.**

Transcriptome and translatome libraries read quality were assessed using FastQC v0.11.5 (Babraham Institute, Cambridge, UK). Ribosomal RNAs were discarded using SortMeRNA v2.1b [10]. High quality reads were then aligned on the *Homo sapiens* reference transcriptome, version GRCh38.cdna, and quantified using pseudocounts with Kallisto v0.45.0 [11]. Kallisto quantification parameters were fixed



at 25 for k-mer size for the index, 20 for standard deviation and 100 for bootstraps. Statistical differential analyses were performed on each dataset using Wald test from DESeq2 R package [12]. Each count dataset was filtered at 1 count per millions per biological sample after size factors estimation, then dispersion was estimated. Primary risk of probabilities to false discovery fold change was corrected by Benjamini and Hochberg multiple test adjustment. Corrected p-values < at 0.05 % were kept. Volcano plots were realized with ggplot2 R package [13]. Gene identifications were performed with biomaRt R package [14]. Functional annotations were performed with online gProfileR [15] using a g:SCS threshold < at 0.05.

## REFERENCES

1. Martin, M. (2010). *Cutadapt removes adapter sequences from high-throughput sequencing reads*. EMBnet.journal.17.1. <https://doi.org/10.14806/ej.17.1.200>
2. Kopylova, E., et al., SortMeRNA: fast and accurate filtering of ribosomal RNAs in metatranscriptomic data. *Bioinformatics*, 2012. 28: p. 3211–3217.
3. Li, H., et al. (2009). *The Sequence Alignment/Map format and SAMtools*. *Bioinformatics*, 15;25(16):2078-9.
4. Antanaviciute, A. (2017). *m6aViewer: software for the detection, analysis, and visualization of N<sup>6</sup>-methyladenosine peaks from m<sup>6</sup>A-seq/ME-RIP sequencing data*. *RNA*, 23(10):1493-1501. <https://doi.org/10.1261/rna.058206.116>.
5. Durinck, S., et al., “Mapping identifiers for the integration of genomic datasets with the R/Bioconductor package biomaRt.” *Nature Protocols*, 2009. 4: p. 1184–1191.
6. Huaiyu, M., et al. (2019). *PANTHER version 14: more genomes, a new PANTHER GO-slim and improvements in enrichment analysis tools*. *Nucl. Acids Res.* <https://doi.org/10.1093/nar/gky1038>
7. R core team (2020). *R: A language and environment for statistical computing*. R Foundation for Statistical Computing. Vienna, Austria. URL <https://www.R-project.org/>
8. McKinney, W. (2010). *Data Structures for statistical computing in python*. Proc. Of the 9<sup>th</sup> python in science conf. (SCIPY 2010).
9. David, A., et al., *RNA binding targets aminoacyl-tRNA synthetases to translating ribosomes*. *J Biol Chem*, 2011. 286(23): p. 20688-700.
10. Kopylova ,E., et al., SortMeRNA: fast and accurate filtering of ribosomal RNAs in metatranscriptomic data. *Bioinformatics*, 2012. 28: p. 3211–3217.
11. Bray , N.L., et al., Near-optimal probabilistic RNA-seq quantification. *Nature Biotechnology*, 2016. 34: p. 525-527.
12. Love, M.I., et al., Moderated estimation of fold change and dispersion for RNA-seq data with DESeq2. *Genome Biology*, 2014. 15(12): p. 550.
13. Wickham, H. *ggplot2: Elegant Graphics for Data Analysis*. Springer-Verlag New York, 2016.
14. Durinck, S., et al., “Mapping identifiers for the integration of genomic datasets with the R/Bioconductor package biomaRt.” *Nature Protocols*, 2009. 4: p. 1184–1191.

15. Reimand, J., et al., g:Profiler -- a web server for functional interpretation of gene lists (2016 update). *Nucleic Acids Research*, 2016. doi:10.1093/nar/gkw199.
